# Supplementary material for: Breeding for resilience in finishing pigs can decrease tail biting, lameness and mortality
Source: Springer Nature journal article supplement (doi:10.1186/s12711-024-00919-1), 2024-06-20

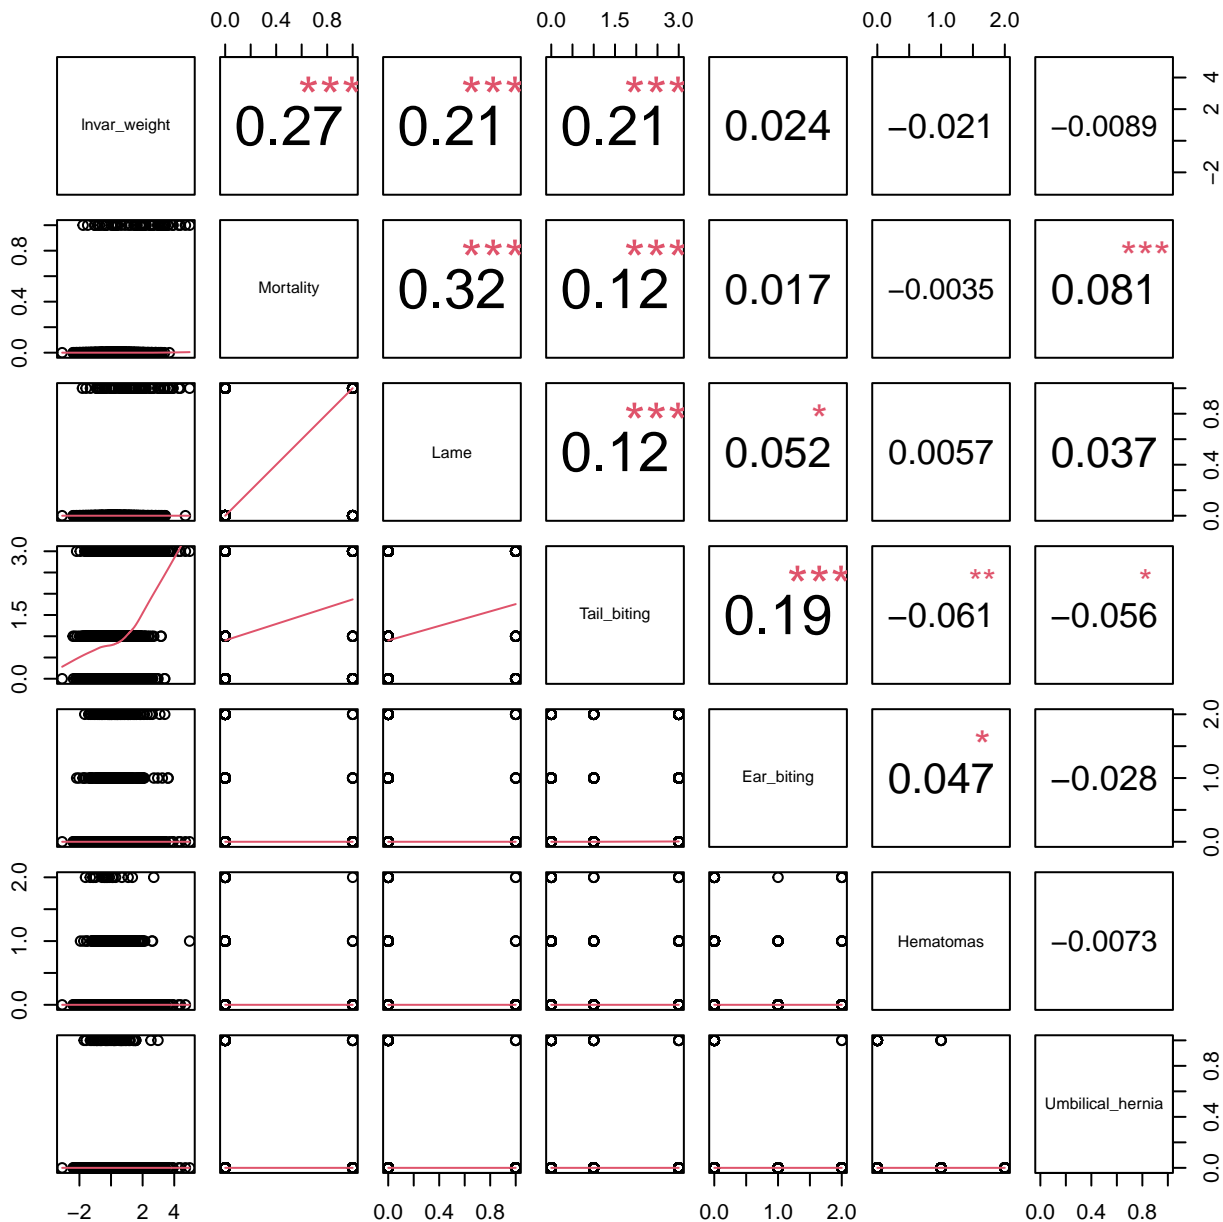

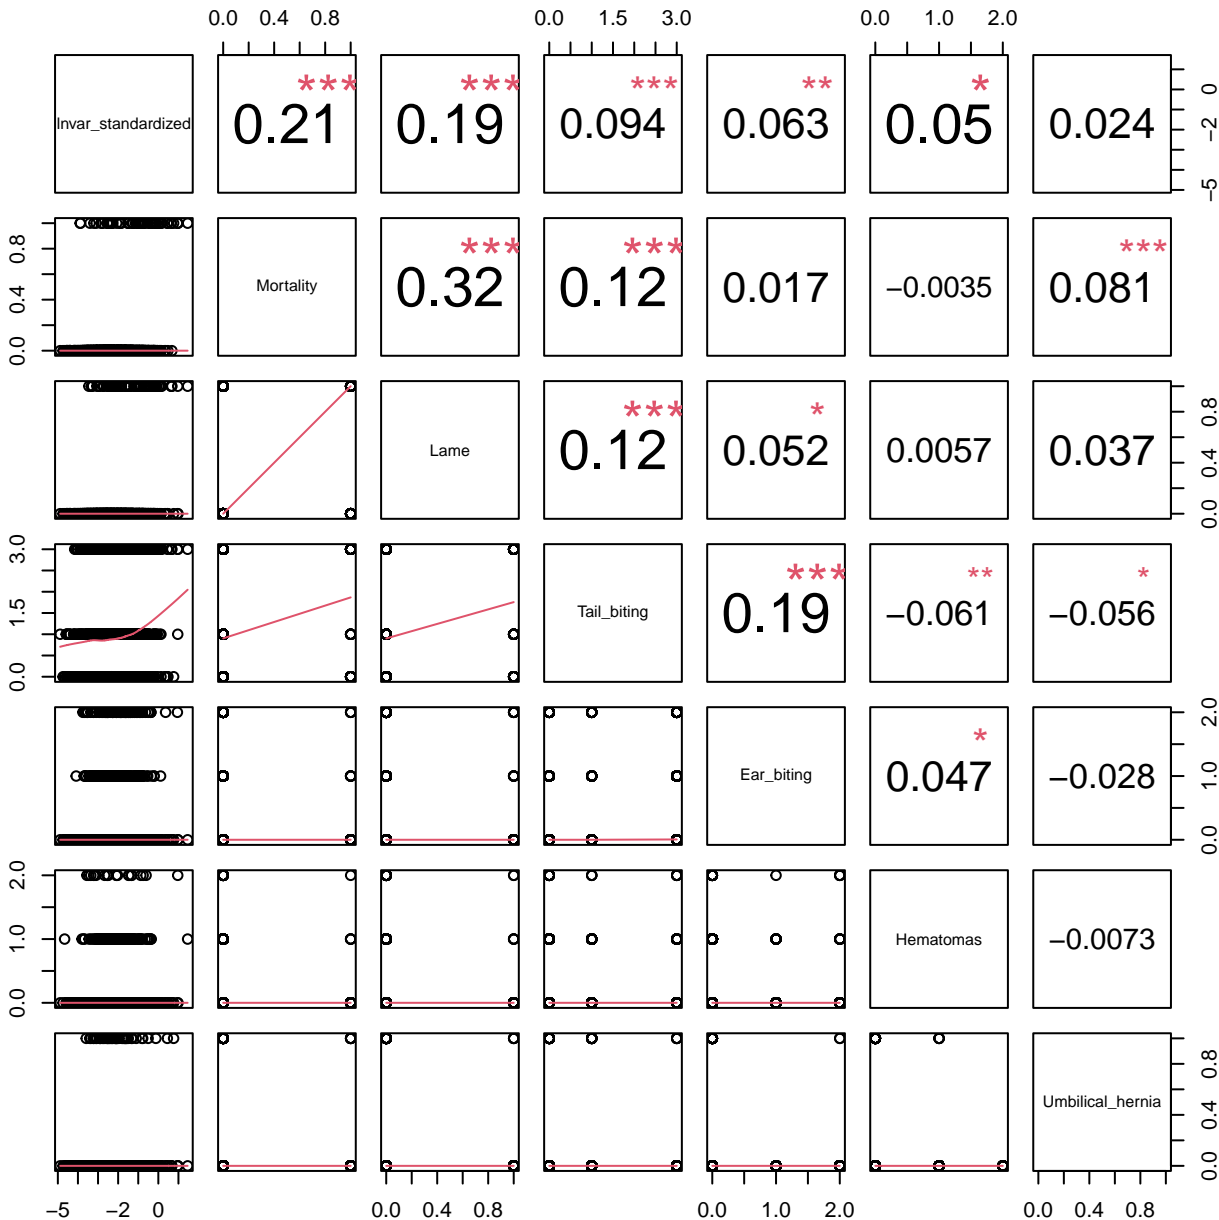

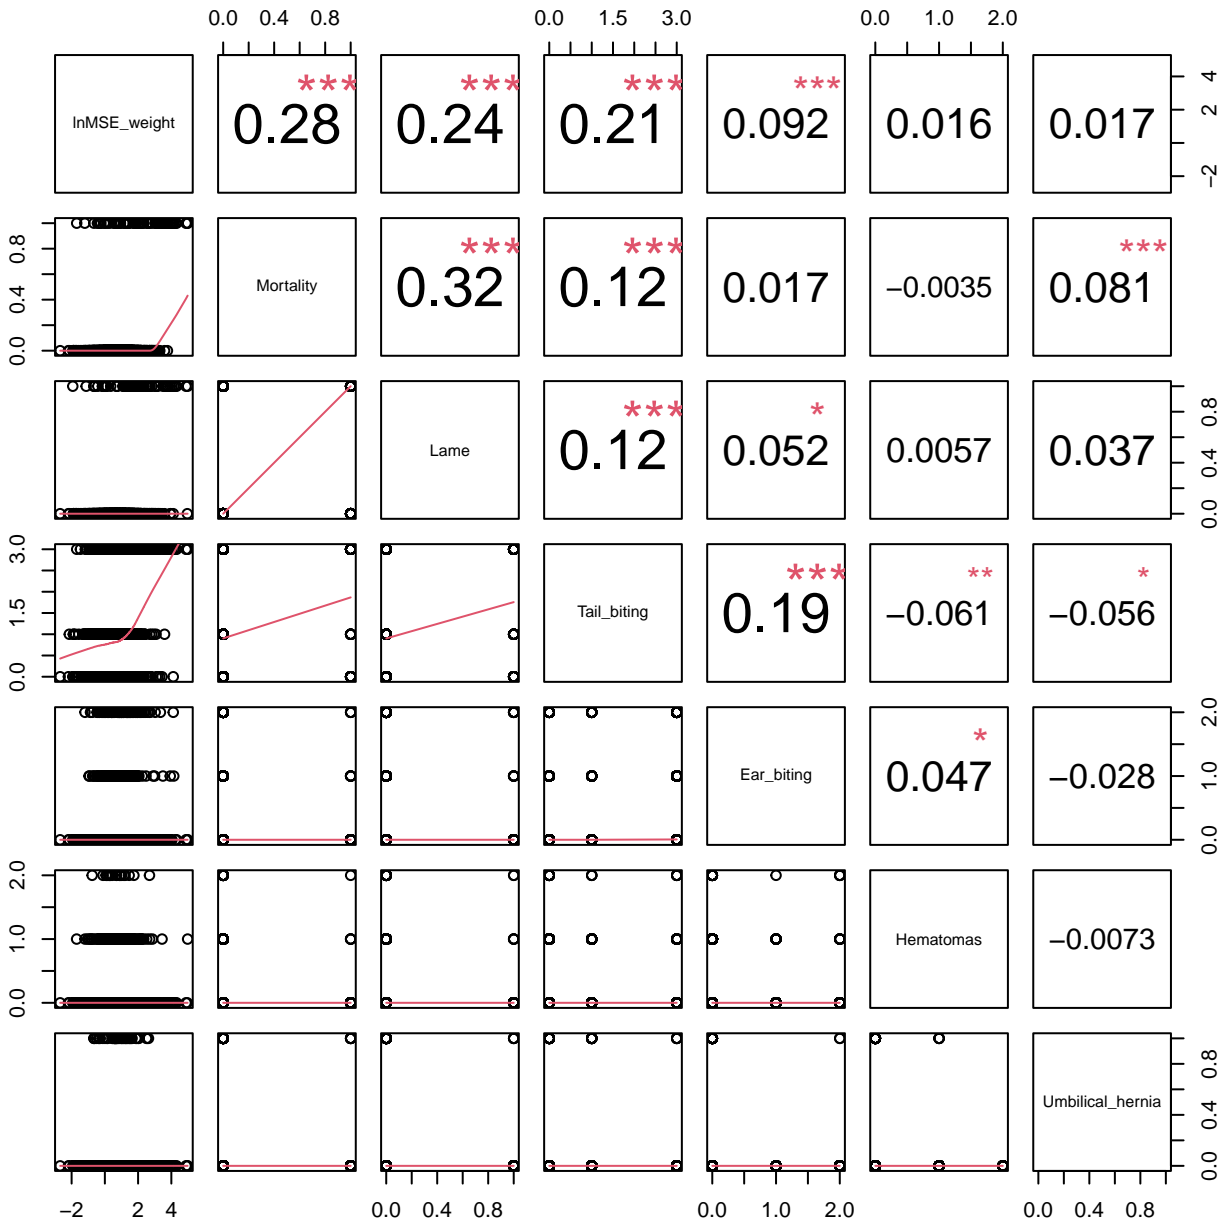

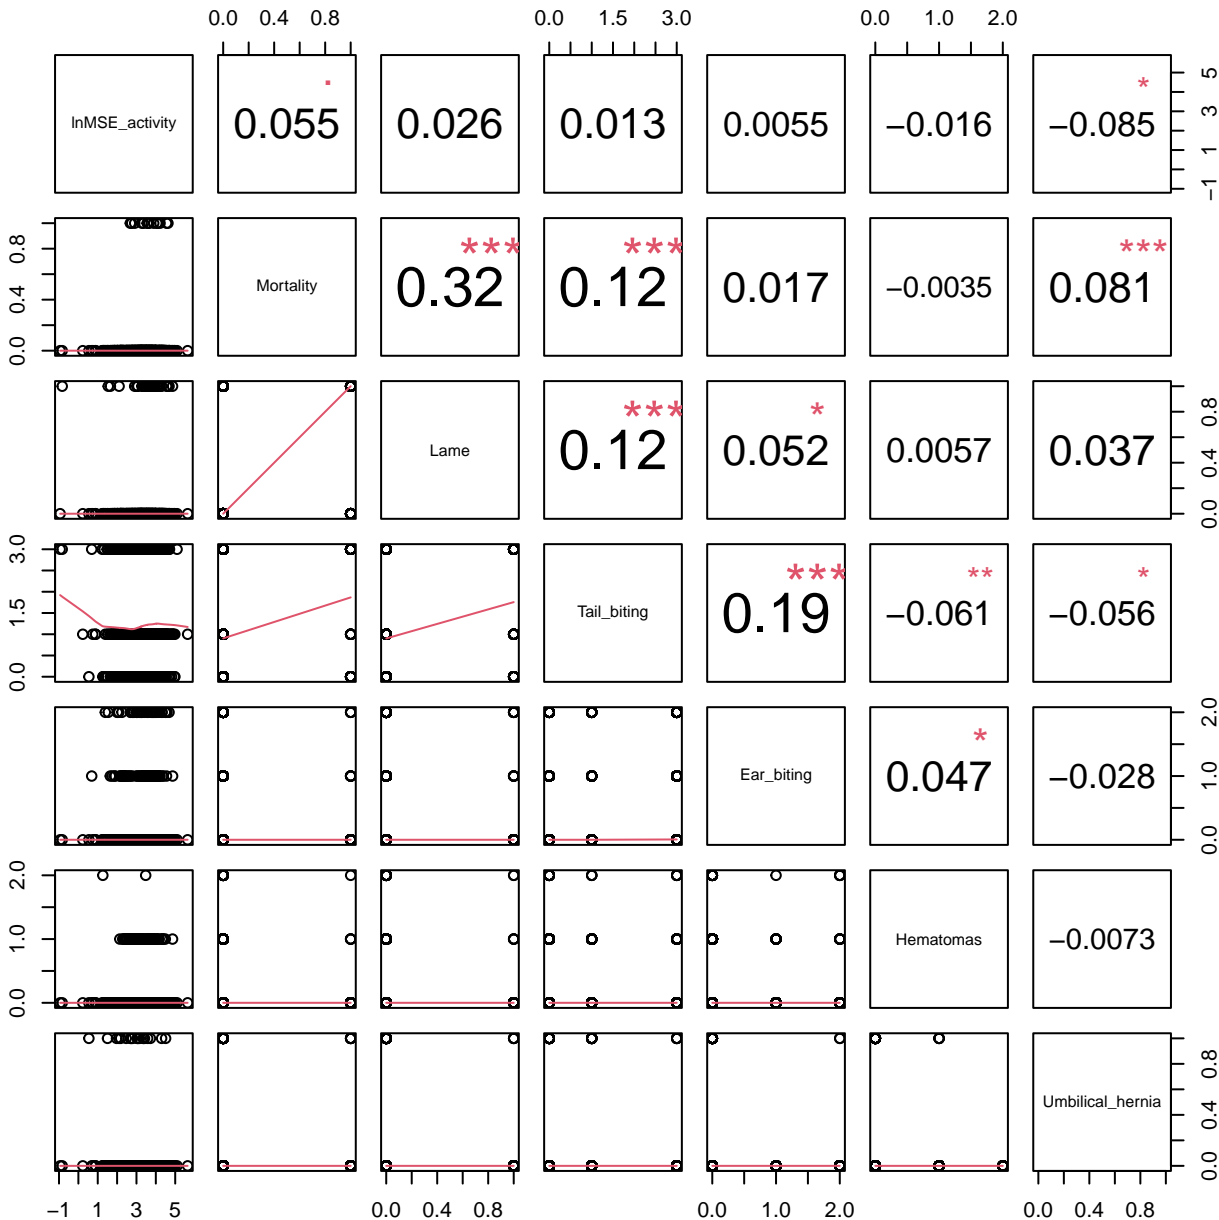

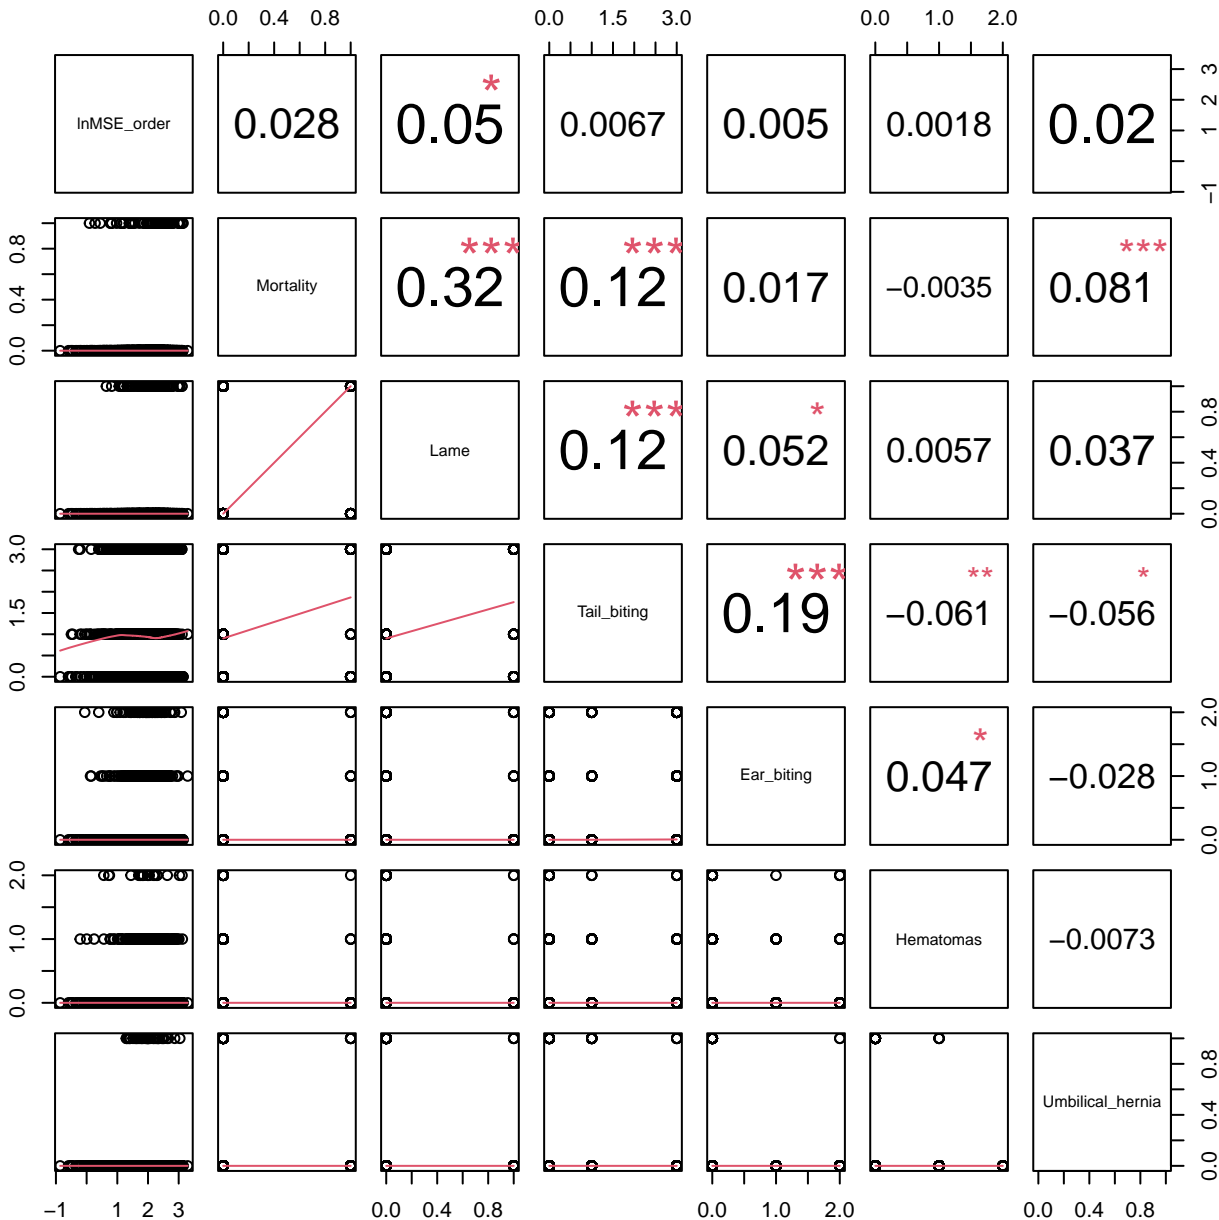

Supplement: MOESM6 [file 12711_2024_919_MOESM6_ESM.pdf]
